# Supplementary material
Source: publisher figshare collection journal article supplement (https://frontiersin.figshare.com/ndownloader/files/11094095)
Supplement: Supplementary file [file 11094095]

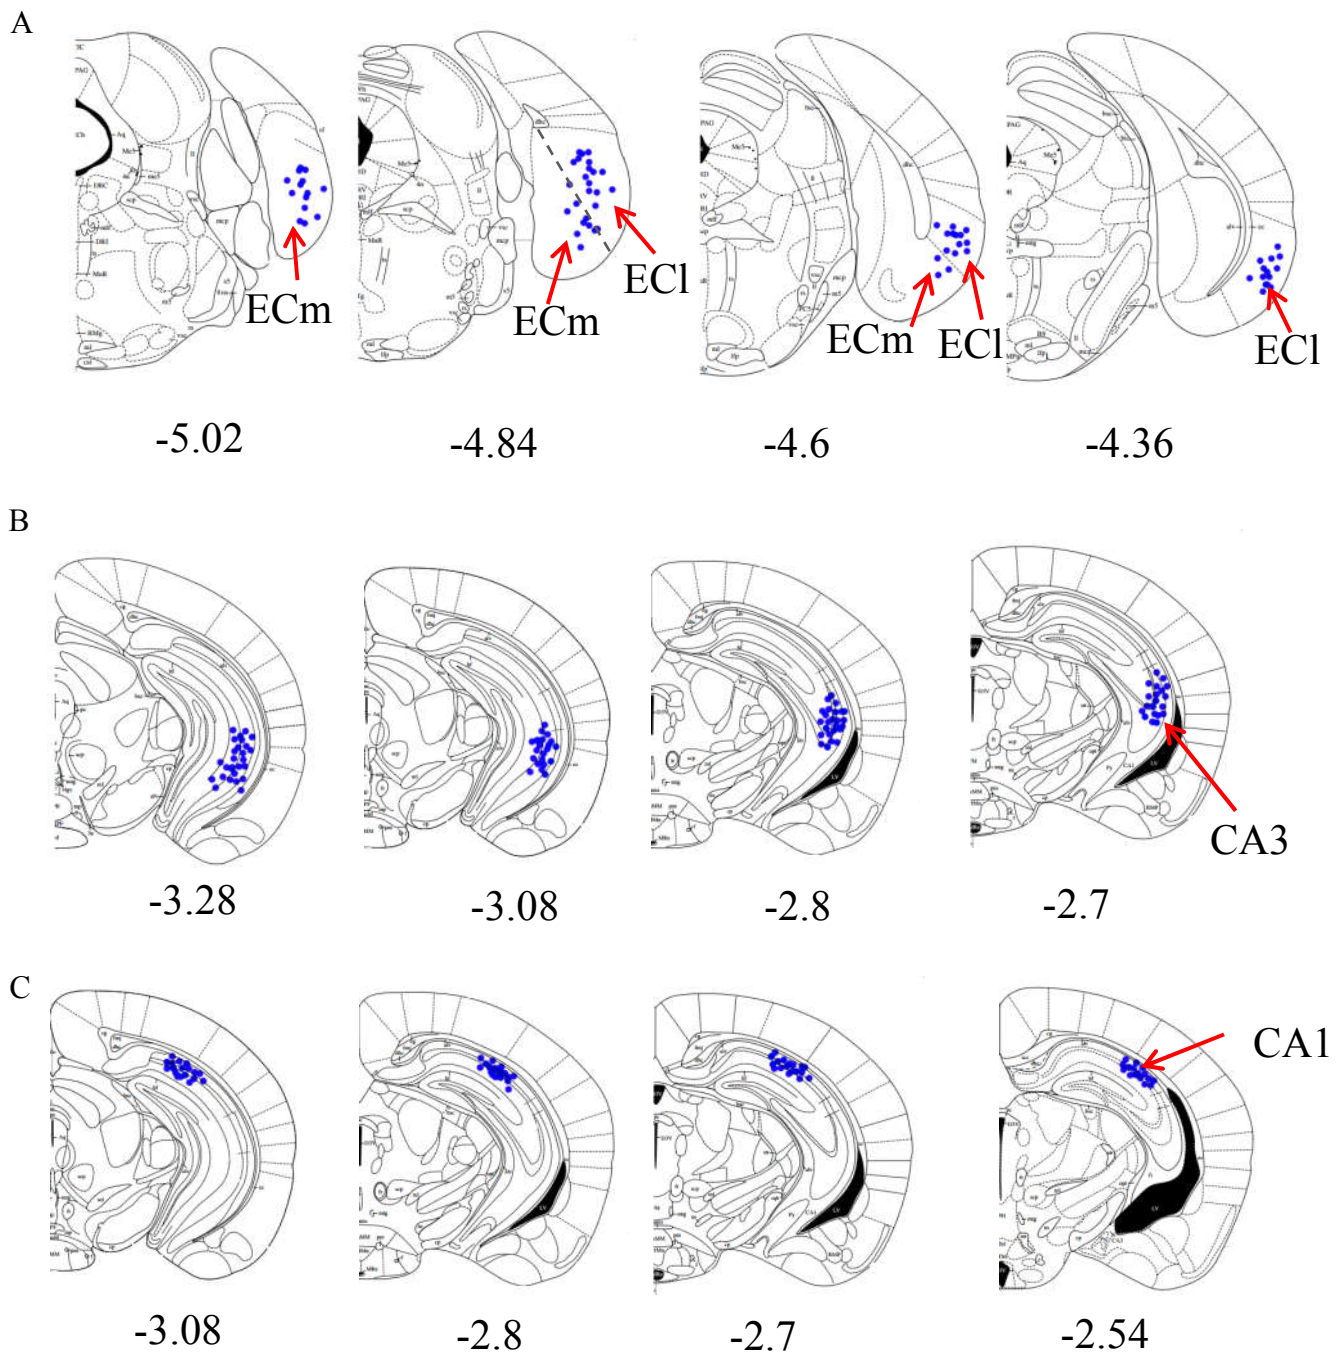

Supplemental Figure 3

(A-C) Schematic drawings show the reconstructed recording sites in EC (n= 65 cells), CA3 (n= 93 cells) and CA1 (n=69 cells). All of these neurons are auditory-responsive population. ECl, lateral entorhinal; ECm, medial entorhinal cortex.
